# Supplementary material for: Inversion of donor–acceptor roles in photoinduced intervalence charge transfers
Source: Royal Society of Chemistry journal article supplement (doi:10.1039/c9cc03483h), 2019-01-01
Supplement: c9cc03483h1.pdf [file c9cc03483h1.pdf]

## SUPPORTING INFORMATION

for

# **Inversion of donor-acceptor roles in photoinduced intervalence charge transfers**

by

Bruno M. Aramburu-Trošelj, Paola S. Oviedo, Ivana Ramírez-Wierzbicki, Luis M. Baraldo, and  
Alejandro Cadranel.

| <b>Contents</b>      | <b>Page</b> |
|----------------------|-------------|
| Experimental Details | S2          |
| Figure S1            | S3          |
| Figure S2            | S3          |
| Figure S3            | S4          |
| Figure S4            | S4          |
| Figure S5            | S5          |
| Figure S6            | S5          |
| Figure S7            | S6          |
| Table S1             | S6          |
| Figure S8            | S7          |
| References           | S7          |

## Experimental details

**Materials.**  $\text{RuRu}^{2-}$ ,  $\text{RuOs}^{2-}$ ,  $\text{RuFe}^{2-}$  and  $\text{RuNCS}^+$  were prepared according to published procedures.<sup>1,2</sup> Anhydrous DMSO was provided by Sigma Aldrich and used as supplied.

**Methods.** Excitation and emission spectra were recorded in a PTI-QuantaMaster or a Cary Eclipse spectrofluorimeter. Quantum yields were measured in argon-saturated solutions using  $[\text{Ru}(\text{bpy})_3]^{2+}$  ( $\phi = 0.095^3$  in ACN at 25 °C). Fluorescence lifetimes were determined through the time-correlated single photon counting (TCSPC) technique using a Fluorolog 3 (Horiba Jobin Yvon). All measurements were conducted under argon atmosphere. The time profiles were recorded at 700 nm. Ultrafast transient absorption (TA) experiments were conducted using an amplified Ti:sapphire fs laser system (Clark MXR CPA2101 and 2110, 1kHz, FWHM = 150 fs,  $\lambda_{\text{exc}} = 505$  nm, 200-300 nJ per pulse) with TA pump / probe Helios and EOS detection systems from Ultrafast Systems. For the picosecond to nanosecond experiments (Helios), white light was generated focusing a fraction of the fundamental 775 nm output onto a 2 mm sapphire disk (~430–760 nm) or a 1 cm sapphire disk (~800–1600 nm). A magic angle configuration was employed to avoid rotational dynamics. Excitation pulses of 505 nm wavelength were generated by a NOPA. Bandpass filters with  $\pm 5$  or  $\pm 10$  nm were used to ensure low spectral width and to exclude 775 nm photons. For the nanosecond to microsecond experiments (EOS), white light (~370 to >1600 nm) was generated by a built-in photonic crystal fiber supercontinuum laser source with a fundamental of 1064 nm at 2 kHz output frequency and pulse width of approximately 1 ns. All measurements were conducted in a 2 mm quartz cuvettes under argon atmosphere. Obtained data were treated by global and target analyses using the R-package TIMP and GloTarAn.<sup>4-6</sup>

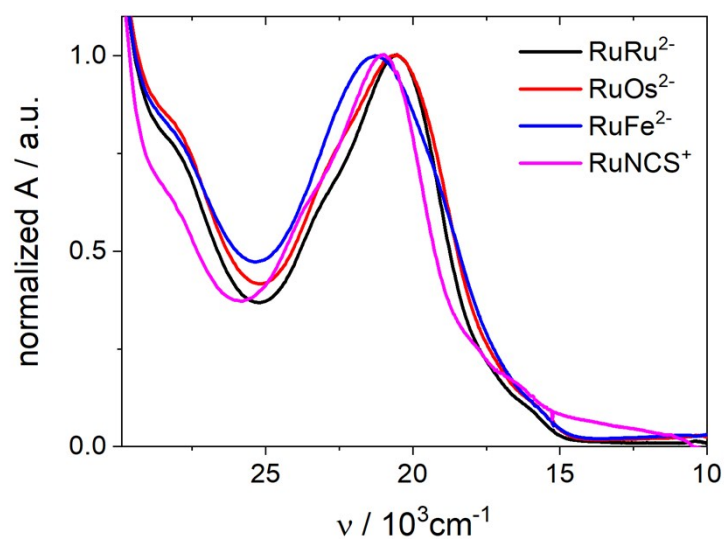

**Figure S1.** UV-vis absorption spectra of **RuRu<sup>2-</sup>**, **RuOs<sup>2-</sup>**, **RuFe<sup>2-</sup>** and **RuNCS<sup>+</sup>** in water at room temperature.

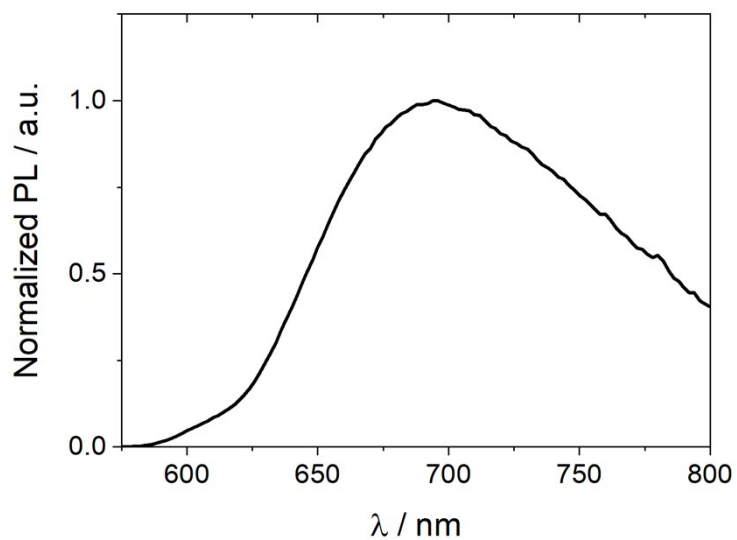

**Figure S2.** Normalized emission spectrum of **RuNCS<sup>+</sup>** in water at room temperature.

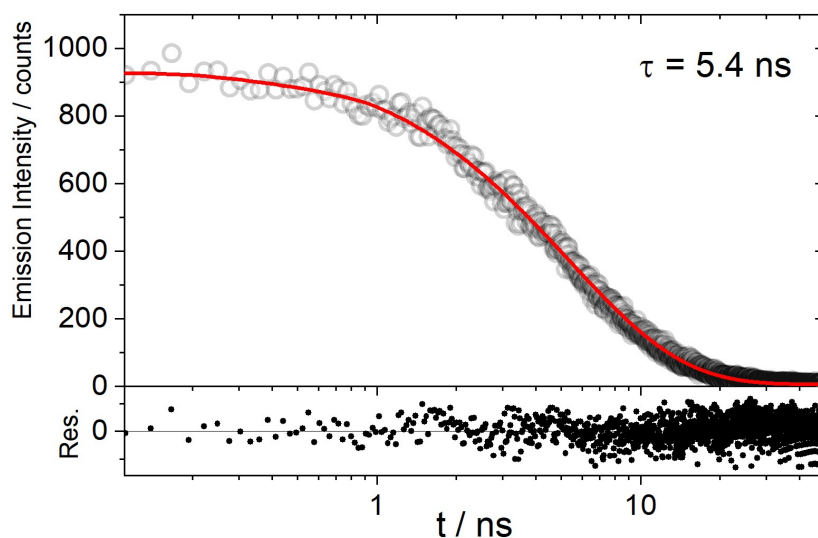

**Figure S3.** TCSPC emission lifetime of **RuNCS<sup>+</sup>** in water at room temperature (black dots) and monoexponential fitting (red curve).

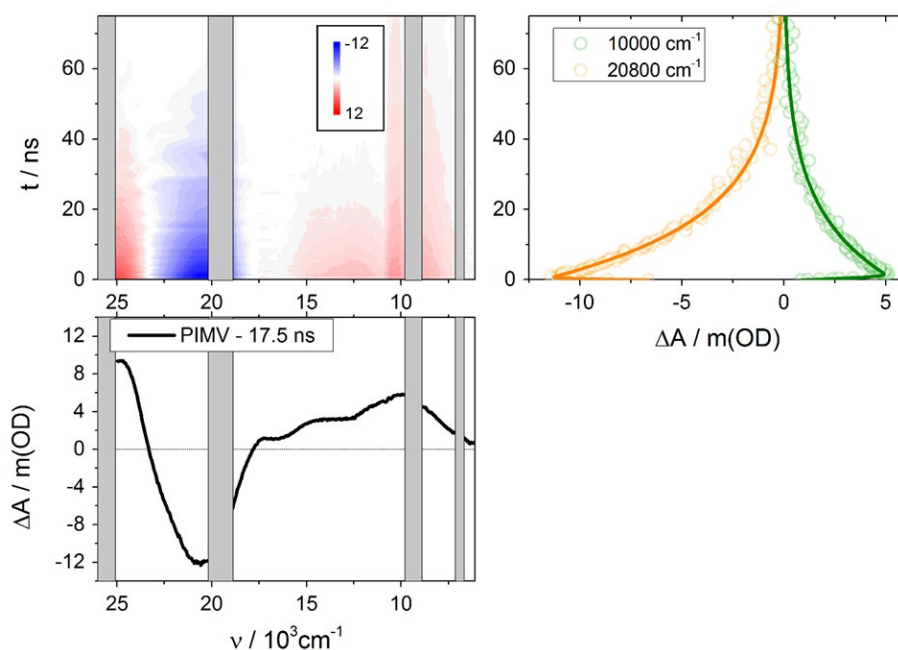

**Figure S4.** Upper left: Differential absorption 3D map obtained from nanosecond pump-probe experiments ( $\lambda_{\text{exc}} = 505$  nm) for **RuRu<sup>2-</sup>** in water at room temperature. Upper right: Time absorption profiles (open circles) and corresponding fittings from global analysis (solid lines). Bottom left: Decay-associated differential spectra.

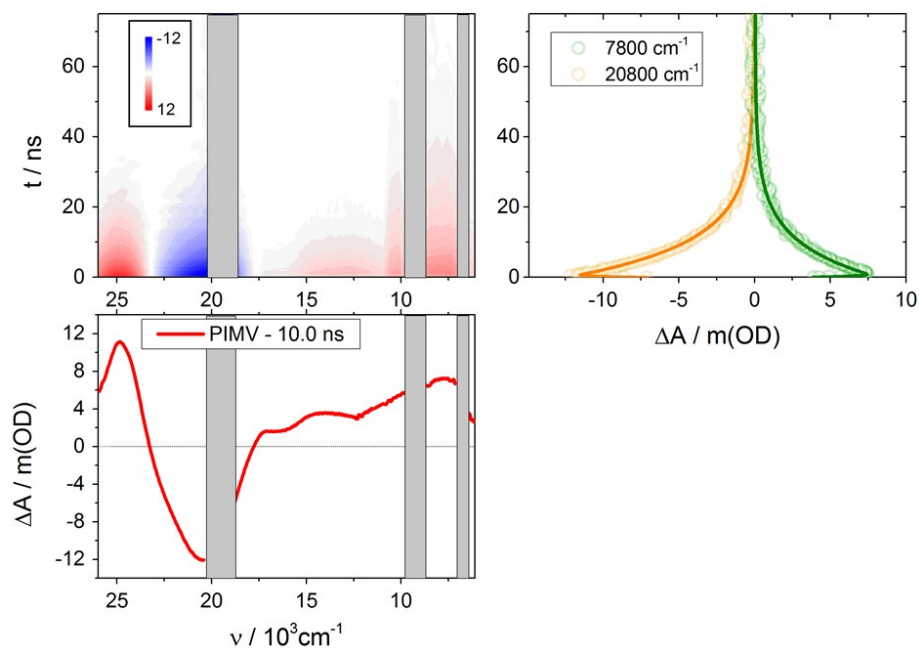

**Figure S5.** Upper left: Differential absorption 3D map obtained from nanosecond pump-probe experiments ( $\lambda_{\text{exc}} = 505 \text{ nm}$ ) for **RuOs<sup>2-</sup>** in water at room temperature. Upper right: Time absorption profiles (open circles) and corresponding fittings from global analysis (solid lines). Bottom left: Decay-associated differential spectra.

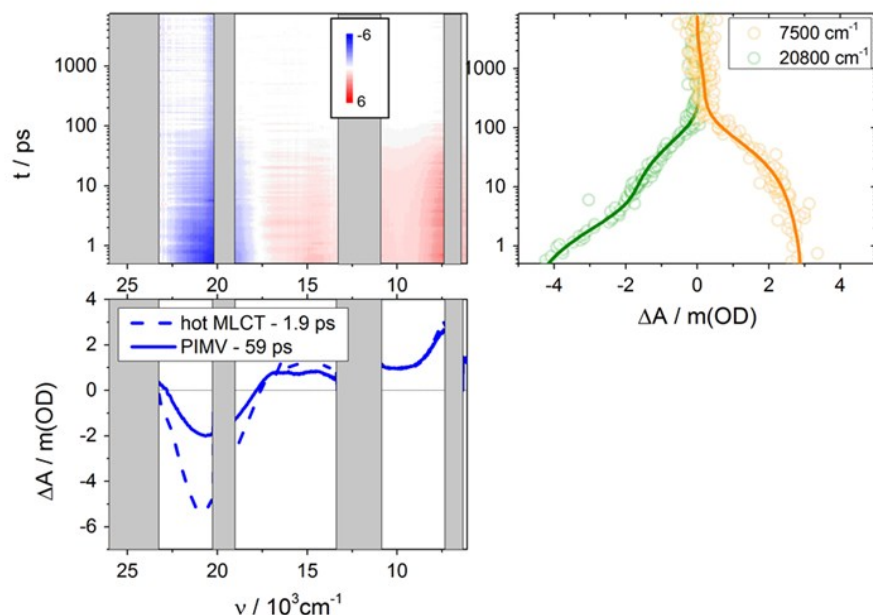

**Figure S6.** Upper left: Differential absorption 3D map obtained from picosecond pump-probe experiments ( $\lambda_{\text{exc}} = 505 \text{ nm}$ ) for **RuFe<sup>2-</sup>** in water at room temperature. Upper right: Time absorption profiles (open circles) and corresponding fittings from global analysis (solid lines). Bottom left: Decay-associated differential spectra.

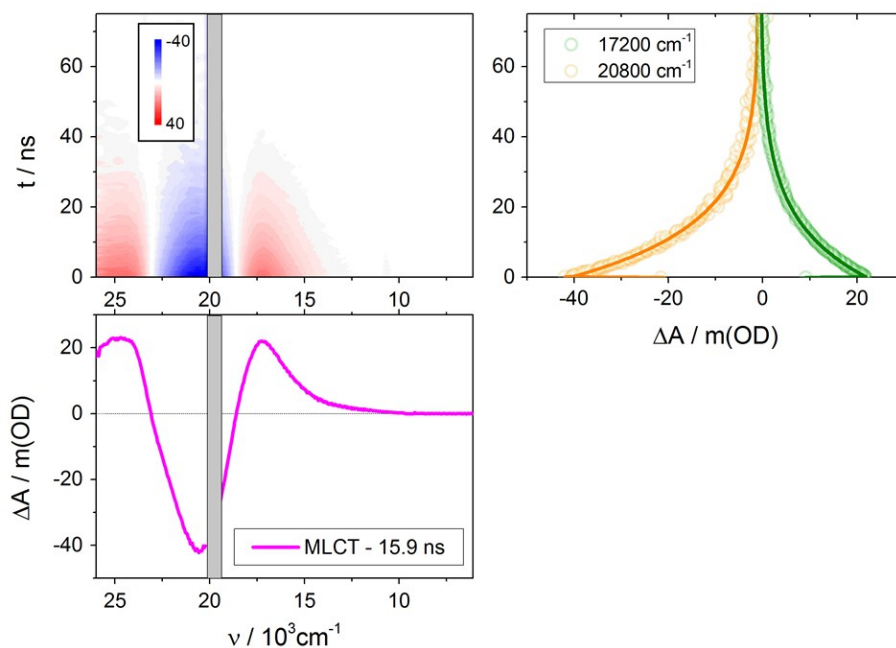

**Figure S7.** Upper left: Differential absorption 3D map obtained from nanosecond pump-probe experiments ( $\lambda_{\text{exc}} = 505$  nm) for **RuNCS<sup>+</sup>** in DMSO at room temperature. Upper right: Time absorption profiles (open circles) and corresponding fittings from global analysis (solid lines). Bottom left: Decay-associated differential spectra.

**Table S1.** Time constants extracted from global analyses of transient absorption experiments for **RuRu<sup>2-</sup>**, **RuOs<sup>2-</sup>**, **RuFe<sup>2-</sup>** and **RuNCS<sup>+</sup>** exciting at 505 nm, and TCSPC lifetimes.

| Compound                 | Solvent | Transient Absorption                          |                                               | TCSPC                   |
|--------------------------|---------|-----------------------------------------------|-----------------------------------------------|-------------------------|
|                          |         | $\tau_1$ / ps<br>( $k_1$ / ps <sup>-1</sup> ) | $\tau_2$ / ps<br>( $k_2$ / ps <sup>-1</sup> ) | $\tau_{\text{em}}$ / ps |
| <b>RuRu<sup>2-</sup></b> | water   | -                                             | 17500<br>( $5.72 \pm 0.08$ ) $\times 10^{-5}$ | 16600                   |
| <b>RuOs<sup>2-</sup></b> | water   | -                                             | 10000<br>( $9.99 \pm 0.01$ ) $\times 10^{-5}$ | 9300                    |
| <b>RuFe<sup>2-</sup></b> | water   | 1.9<br>( $0.52 \pm 0.01$ )                    | 59<br>( $0.0170 \pm 0.0001$ )                 | -                       |
| <b>RuNCS<sup>+</sup></b> | DMSO    | -                                             | 15900<br>( $6.31 \pm 0.02$ ) $\times 10^{-5}$ | 14400                   |

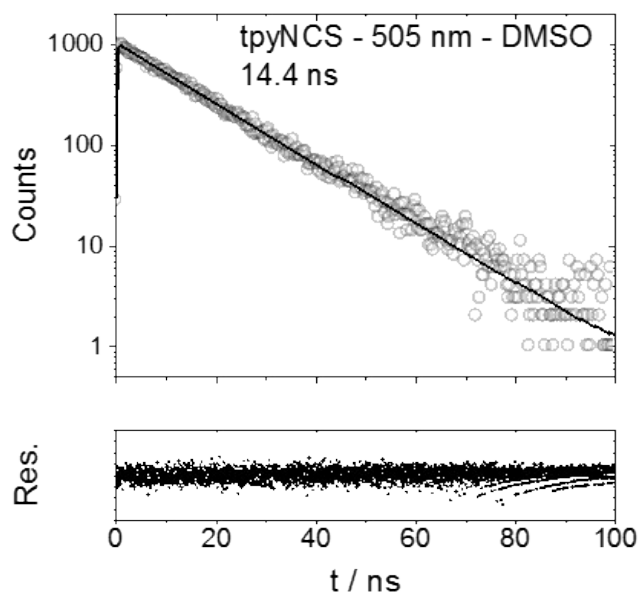

**Figure S8.** TCSPC emission lifetime of **RuNCS<sup>+</sup>** in DMSO at room temperature (black dots) and monoexponential fitting (black curve).

## References

- (1) Cadranel, A.; Alborés, P.; Yamazaki, S.; Kleiman, V. D.; Baraldo, L. M. Efficient Energy Transfer via the Cyanide Bridge in Dinuclear Complexes Containing Ru(II) Polypyridine Moieties. *Dalt. Trans.* **2012**, 41 (17), 5343–5350. <https://doi.org/10.1039/c2dt11869f>.
- (2) Cadranel, A.; Aramburu Trošelj, B. M.; Yamazaki, S.; Alborés, P.; Kleiman, V. D.; Baraldo, L. M. Emissive Cyanide-Bridged Bimetallic Compounds as Building Blocks for Polymeric Antennae. *Dalt. Trans.* **2013**, 42 (48), 16723–16732. <https://doi.org/10.1039/c3dt51164b>.
- (3) Yamamoto, Y.; Tamaki, Y.; Yui, T.; Koike, K.; Ishitani, O. New Light-Harvesting Molecular Systems Constructed with a Ru ( II ) Complex and a Linear-Shaped Re ( I ) Oligomer. *J. Am. Chem. Soc.* **2010**, 132 (33), 11743–11752.
- (4) Snellenburg, J. J.; Liptenok, S. P.; Seger, R.; Mullen, K. M.; van Stokkum, I. H. M. Glotaran : A Java -Based Graphical User Interface for the R Package TIMP. *J. Stat. Softw.* **2012**, 49 (3), 1–22.
- (5) Mullen, K. M.; van Stokkum, I. H. M. TIMP: An R Package for Modeling Multi-Way Spectroscopic Measurements. *J. Stat. Softw.* **2007**, 18 (3), 46.
- (6) Stokkum, I. H. M. Van; Larsen, D. S.; Grondelle, R. Van. Global and Target Analysis of Time-Resolved Spectra. **2004**, 1657, 82–104. <https://doi.org/10.1016/j.bbabbio.2004.04.011>.
